# Supplementary material for: Non-fluorinated synthesis of anatase TiO2 with dominant {001} facets: influence of faceted structures on formaldehyde sensitivity
Source: Royal Society of Chemistry journal article supplement (doi:10.1039/c7nj00648a), 2017-01-01
Supplement: c7nj00648a1.pdf [file c7nj00648a1.pdf]

Supporting Information

**Non-fluorinated Synthesis of Anatase TiO<sub>2</sub> with Dominant {001} Facets: Influence of Faceted Structures on Formaldehyde Sensitivity**

**Deblina Majumder, Somenath Roy\***

*Sensor and Actuator Division, CSIR-Central Glass and Ceramic Research Institute, Kolkata 700032, INDIA*

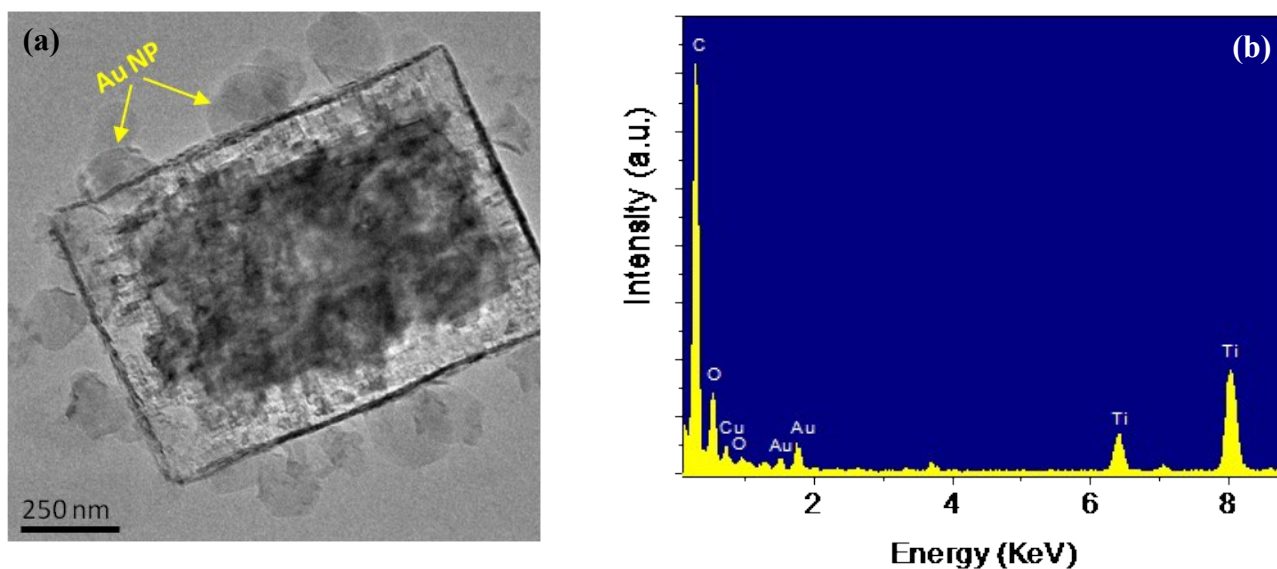

**Fig.S1:** (a) TEM micrograph and (b) EDAX of GNP decorated T3 surface

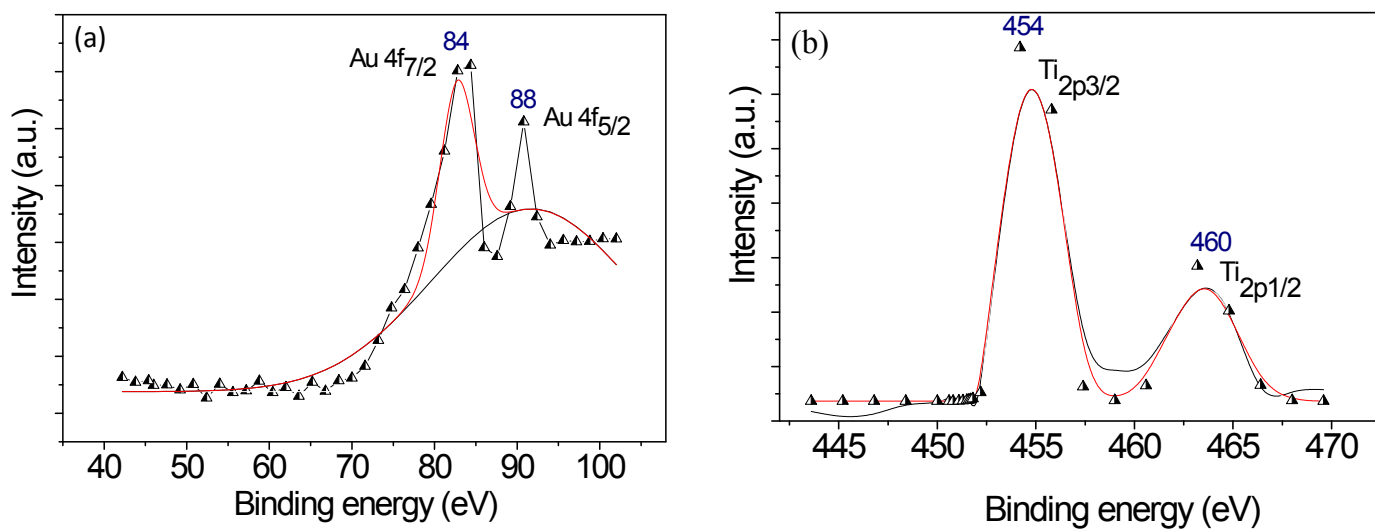

**Fig.S2:** (a) Au 4f and (b) Ti 2p core level XPS spectra of T3

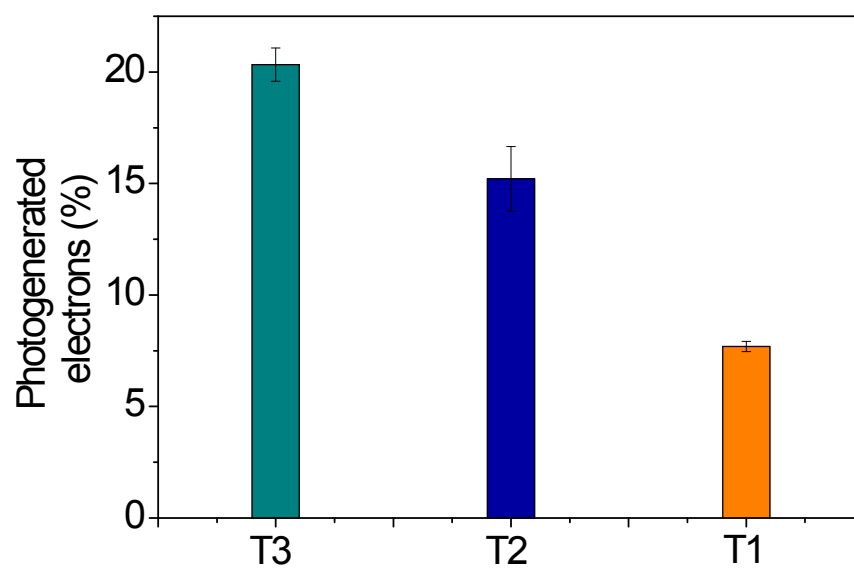

**Fig.S3:** Percentage of photogenerated electrons in T3, T2 and T1

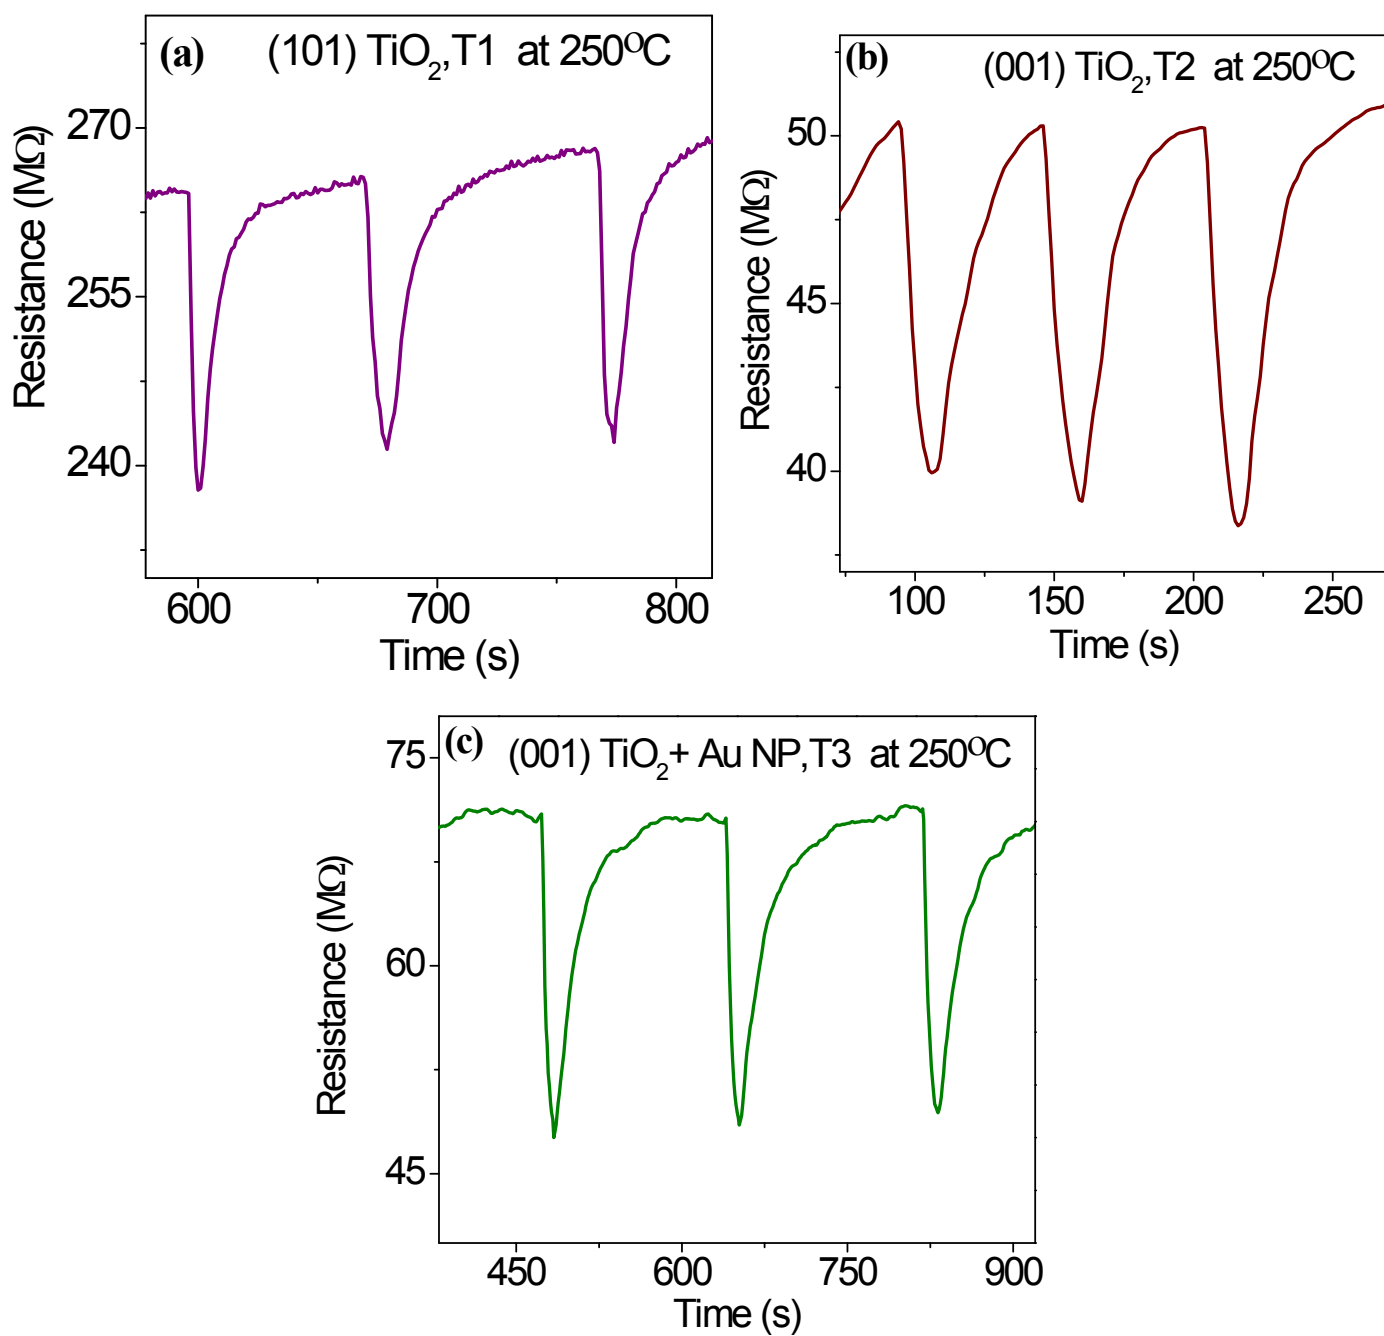

**Fig.S4:** (a), (b) and (c) Dynamic response characteristics of T1, T2 and T3 respectively at 250°C for 50 ppm HCHO

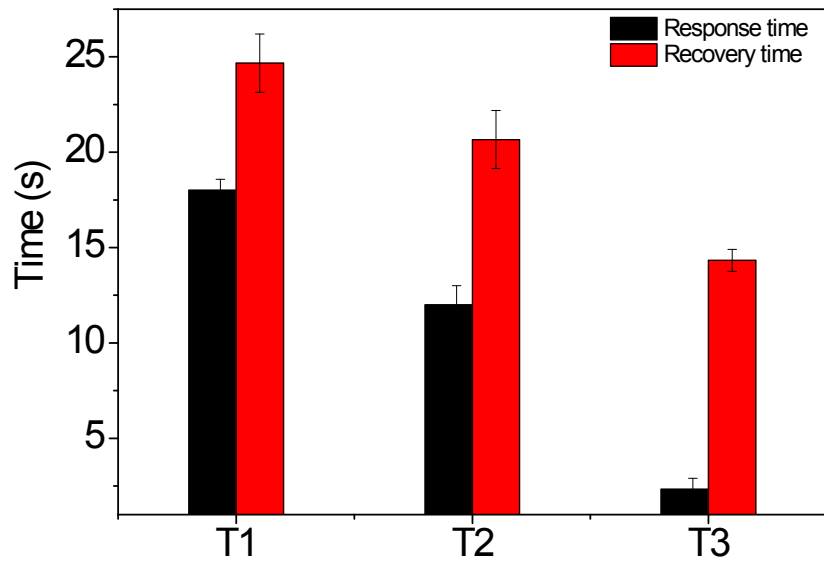

**Fig.S5:** Plot showing response and recovery time of the sensors T1, T2 and T3
